# Supplementary material for: Melamine-promoted formation of bright and stable DNA–silver nanoclusters and their antimicrobial properties
Source: Royal Society of Chemistry journal article supplement (doi:10.1039/c8tb03166e), 2019-01-01
Supplement: c8tb03166e1.pdf [file c8tb03166e1.pdf]

Supporting Information for

## **Melamine-promoted formation of bright and stable DNA-silver nanoclusters and their antimicrobial properties**

Hyunmin Eun,<sup>#,a</sup> Woo Young Kwon,<sup>#,a</sup> Kalimuth Kalishwaralal,<sup>a</sup> Yonghwan Kim,<sup>b</sup> Miran Lee,<sup>b</sup> Jung-Oh Ahn,<sup>c</sup> Hongweon Lee,<sup>c</sup> Sang Hyun Lee,<sup>a</sup> Hyung Joo Kim,<sup>a</sup> Hyun Gyu Park<sup>d</sup> and Ki Soo Park<sup>a,\*</sup>

<sup>#</sup> These authors equally contributed to this work.

<sup>a</sup> Department of Biological Engineering, College of Engineering, Konkuk University, Seoul 05029, Republic of Korea

<sup>b</sup> Daisung Green Tech, Gyeonggi-do 13216, Republic of Korea

<sup>c</sup> Biotechnology Process Engineering Center, Korea Research Institute Bioscience Biotechnology (KRIBB), Gwahangno, Yuseong-Gu, Daejeon 305-806, Republic of Korea

<sup>d</sup> Department of Chemical and Biomolecular Engineering (BK21+ Program), KAIST, Daehak-ro 291, Yuseong-gu, Daejeon 305-338, Republic of Korea

\* To whom correspondence should be addressed.

E-mail: kskonkuk@gmail.com; Phone: +82-450-3742; Fax: +82-450-3742

**Table S1.** DNA sequences employed to prepare DNA-AgNCs and their excitation and emission maximum wavelengths.

| <b>Strand name</b> | <b>DNA sequence (5' - 3')</b> | <b>Excitation</b> | <b>Emission</b> |
|--------------------|-------------------------------|-------------------|-----------------|
| Seq A              | CCCTTAATCCCC                  | 597 nm            | 670 nm          |
| Seq B              | CCCTAACTCCCC                  | 650 nm            | 720 nm          |
| Seq C              | CCCCCCCCCCCC                  | 545 nm            | 630 nm          |
| Seq D              | CCTCCTTCCTCC                  | 555 nm            | 630 nm          |
| Seq E              | AGGTCGCCGCCC                  | 575 nm            | 650 nm          |

**Table S2.** The amount of silver in DNA-AgNCs and Mel-DNA-AgNCs.

|               | Concentration of silver (ppm) |
|---------------|-------------------------------|
| DNA-AgNCs     | 6.36±0.46                     |
| Mel-DNA-AgNCs | 7.9±1.10                      |

**Table S3.** Comparison of this method with previous ones to improve the fluorescence properties of DNA-AgNCs.

| Key component/principles  | Advantages                                                               | Disadvantages                                                             | Reference |
|---------------------------|--------------------------------------------------------------------------|---------------------------------------------------------------------------|-----------|
| Triplex DNA               | - No additional chemicals                                                | - Triplex DNA is hard to form and labile to pH and temperature            | [a]       |
| Molecular crowding effect | - Easy synthesis<br>- Universal application to different DNA sequences   | - The enhancement of fluorescence properties is not that significant      | [b]       |
| Thiol-labeled DNA         | - Easy synthesis                                                         | - Expensive chemical modification of DNA template                         | [c]       |
| Poly-cytosine hairpin DNA | - Easy synthesis                                                         | - The enhancement of fluorescence properties is not that significant      | [d]       |
| Protein–DNA interaction   | - Easy synthesis<br>- Universal application to different DNA sequences   | - Requirement of expensive proteins that are labile to pH and temperature | [e]       |
| Melamine–DNA interaction  | - Easy synthesis<br>- Significant enhancement of fluorescence properties | -                                                                         | This work |

[a] L. Feng, Z. Huang, J. Ren and X. Qu, *Nucleic Acids Research*, 2012, **40**, e122–e122.

[b] Z. Huang, J. Ren, W. Yang and X. Qu, *Chem. Commun.*, 2013, **49**, 10856–3.

[c] X. Zhang, Y. Qian, X. Ma, M. Xia, S. Li and Y. Zhang, *Nanoscale*, 2018, **10**, 76–81.

[d] P. R. O’Neill, L. R. Velazquez, D. G. Dunn, E. G. Gwinn and D. K. Fygenson, *J. Phys. Chem. C*, 2009, **113**, 4229–4233.

[e] Z. Zhou and S. Dong, *Nanoscale*, 2015, **7**, 1296–1300.

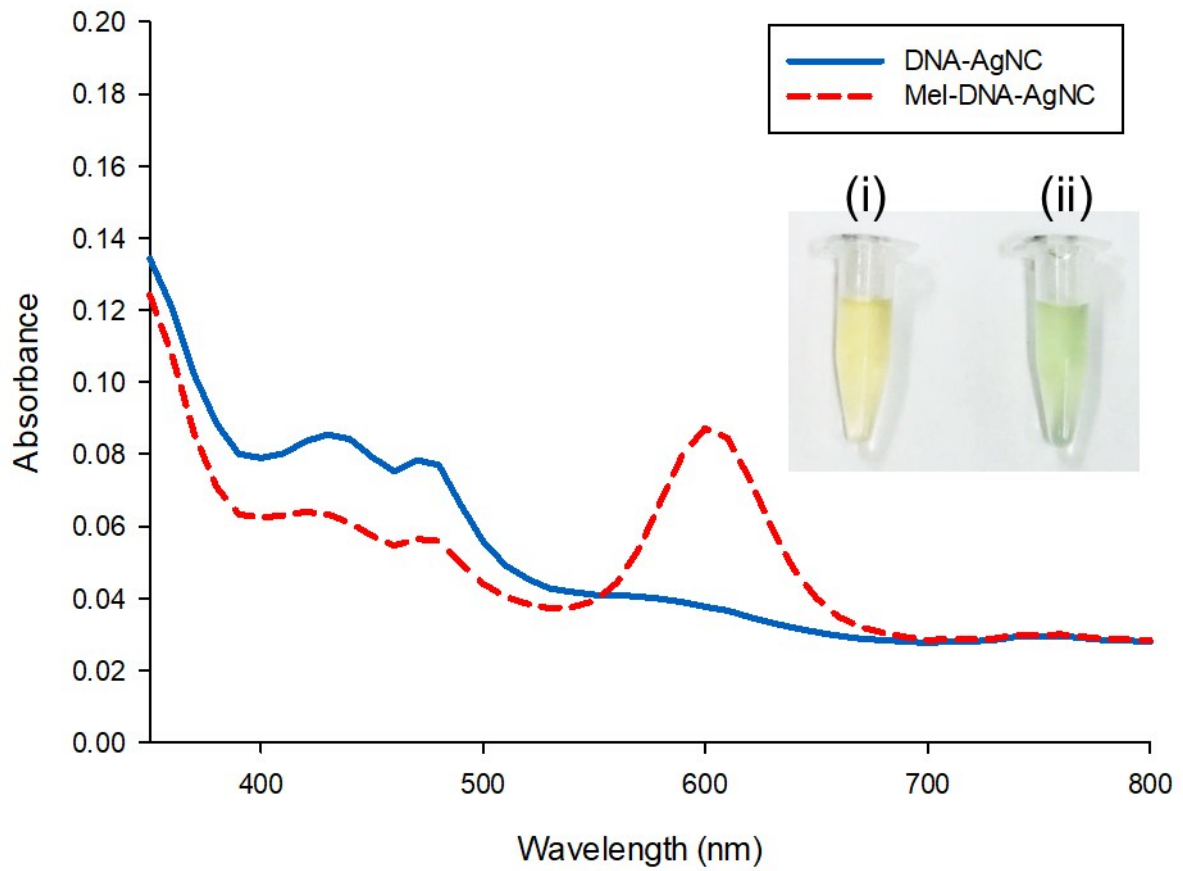

**Figure S1.** Absorption spectra of DNA-AgNCs (blue line) and Mel-DNA-AgNCs (red line). The inset photographs show DNA-AgNCs (i) and Mel-DNA-AgNCs (ii) under visible light.

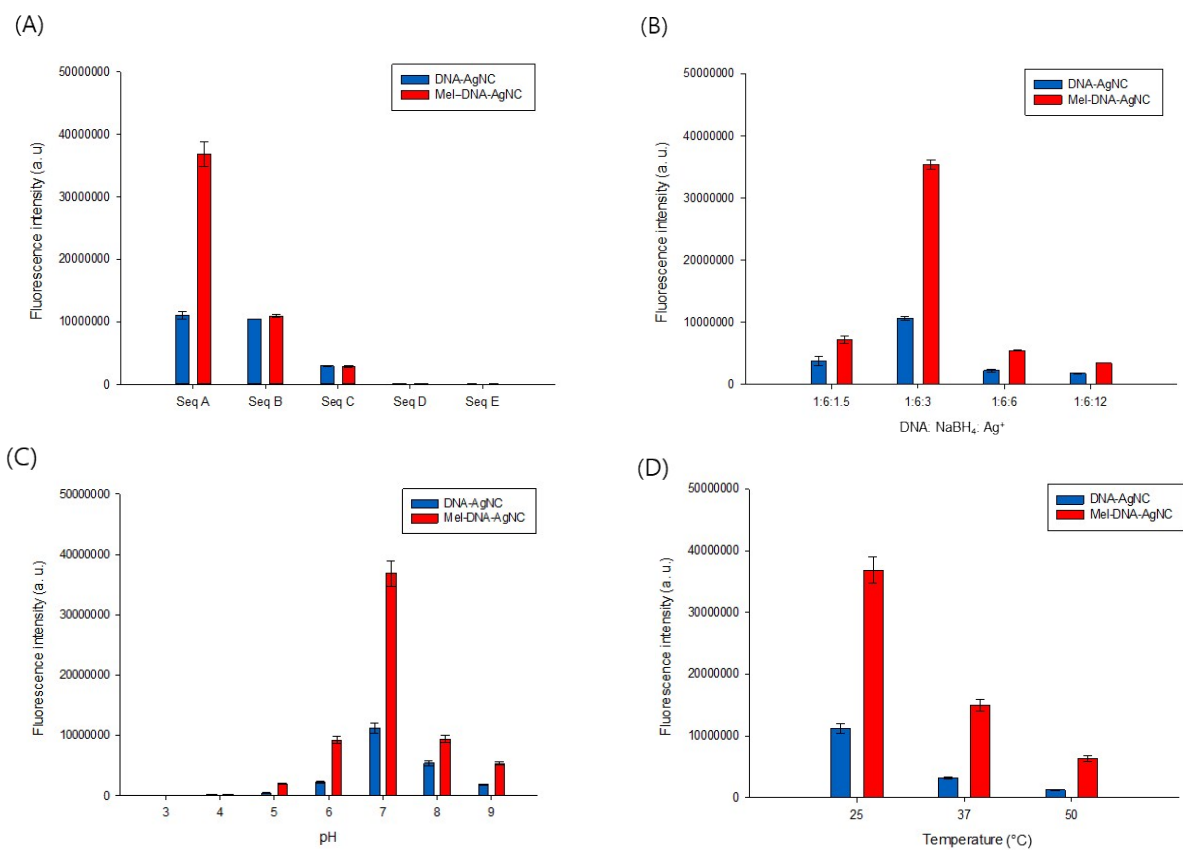

**Figure S2.** Optimization of reaction conditions. Effects of DNA template (A), the molar ratio of DNA:Ag<sup>+</sup>:NaBH<sub>4</sub> (B), pH (C), and temperature (D) on the melamine-promoted fluorescence enhancement of DNA-AgNCs.

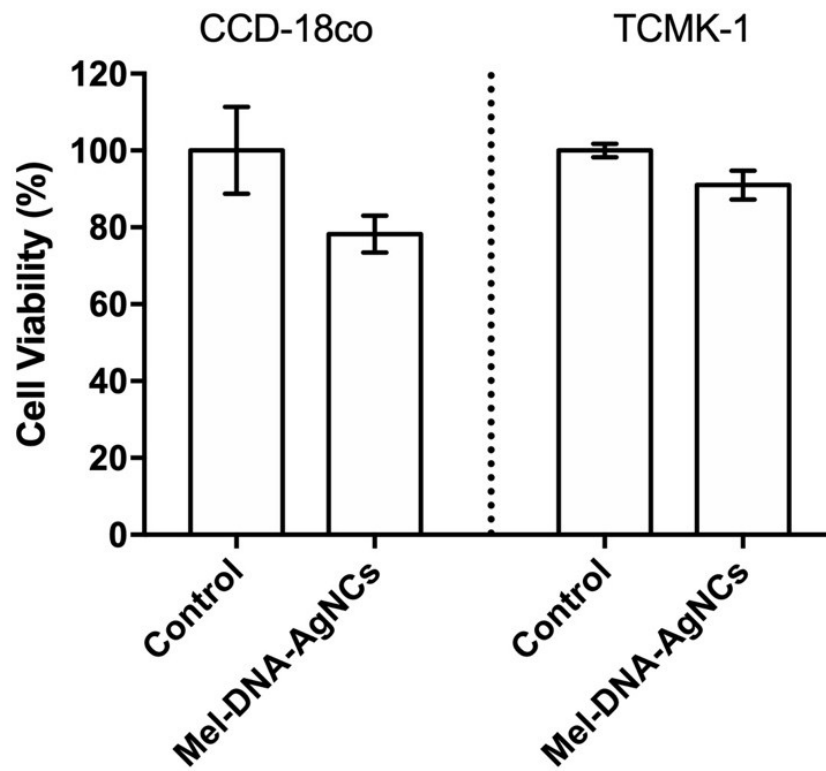

**Figure S3.** Cytotoxicities of Mel-DNA-AgNCs against TCMK-1 (Mus kidney normal) and CCD-18co (Homo sapiens colon normal).
